# Supplementary material
Source: Springer Nature journal article supplement (https://www.springermedizin.de/resource/supplementary/13054_2011_550_MOESM4_ESM.pdf/9708788)

# (A) Crystalloid Volume corrected per BMI

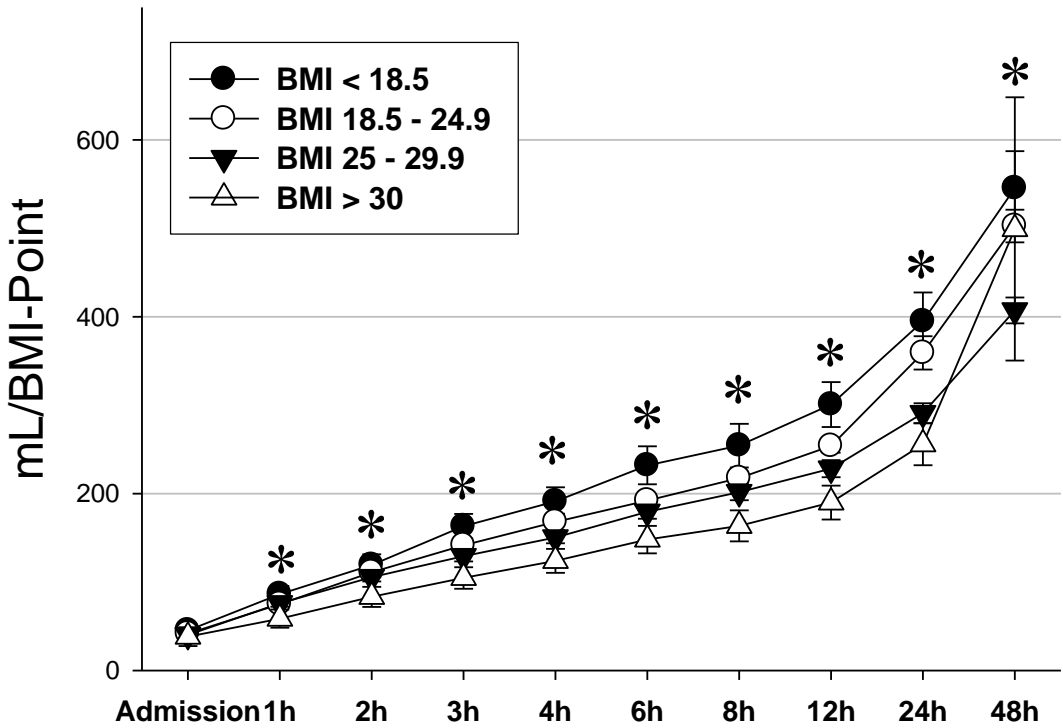

# (B) Colloid Volume corrected per BMI

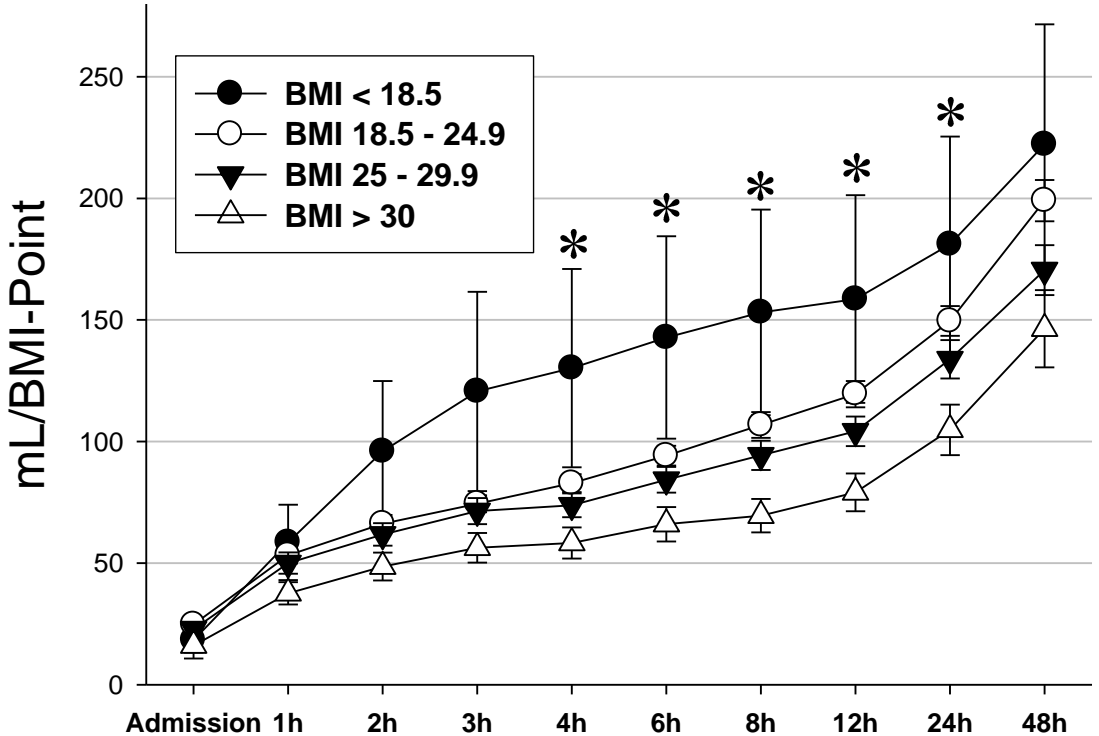

Supplement: MOESM4 [file 9708788]
